# Supplementary material
Source: ML conference proceedings conference paper supplement (https://openreview.net/forum?id=ILP0eZAor6)
Supplement: supplementary_material [file nonst_supple.pdf › nonst_supple.pdf]

## A Further Experiment Results

In our experiments, we set the confidence scaling parameter  $\alpha$  of LinUCB to 1, and the variance of noise in TS to 0.3.

The suboptimality comparisons of models in Low Non-stationary environments and High Non-stationary environments with  $b = 0.018$  (Figure 3) are shown in Figure 4 and 5. We observe that the transformer not only outperforms the expert algorithms but also maintains a consistently low suboptimality rate.

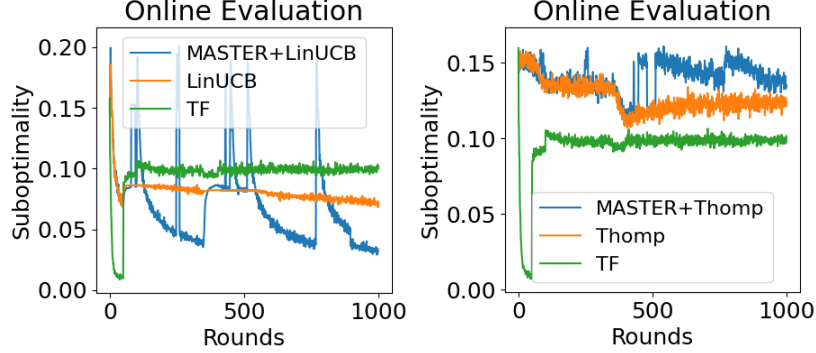

Figure 4: Suboptimality Comparisons of LinUCB, Thompson Sampling (TS), MASTER+LinUCB/TS, and transformer (TF) in Low Non-stationary environments. Linear bandit with  $d = 32$ ,  $A = 10$ . Shading indicates the standard deviation of the regret estimates.

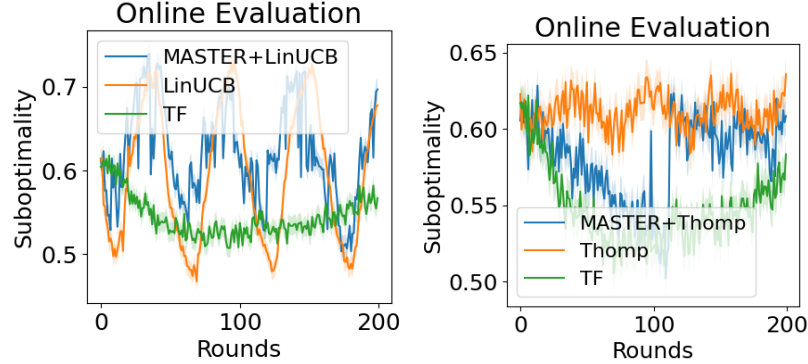

Figure 5: Suboptimality Comparisons of LinUCB, Thompson Sampling (TS), MASTER+LinUCB/TS, and transformer (TF) in High Non-stationary environments ( $b = 0.018$ ). Linear bandit with  $d = 32$ ,  $A = 10$ . Shading indicates the standard deviation of the regret estimates.

Figures 6 and 7 show the results for High Non-stationary environments with  $b = 0.025$ . We observe that when the level of non-stationarity is too high, the transformer loses its superiority compared to the other models. This suggests that the model generalizes well to  $b = 0.018$ , but does not sufficiently generalize to  $b = 0.025$ , possibly due to limited representation in the training data.

## B MASTER Algorithm

We start by introducing MALG (Multi-scale ALGORITHM) (Wei and Luo, 2021). MALG builds on a base reinforcement learning algorithm, ALG, by running multiple instances at different scales. Given an integer  $n$  and a non-increasing function  $\rho : [T] \rightarrow \mathbb{R}$ , MALG operates over a time horizon of length  $2^n$ .

At each time step  $\tau$ , given an integer  $m$ , if  $\tau$  is a multiple of  $2^m$ , MALG schedules a new instance of length  $2^m$  with probability  $\rho(2^m)/\rho(2^m)$ . These are called order- $m$  instances. The start and end

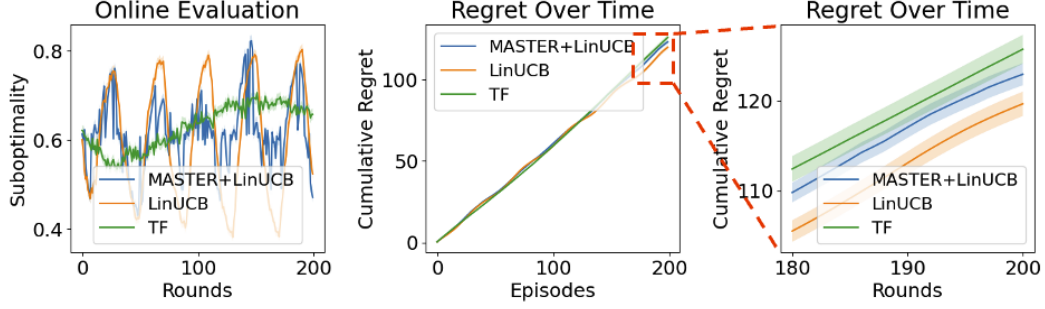

Figure 6: Suboptimality and Cumulative Regret Comparisons of LinUCB, MASTER+LinUCB, and transformer (TF) in High Non-stationary environments ( $b = 0.025$ ). Linear bandit with  $d = 32$ ,  $A = 10$ . Shading indicates the standard deviation of the regret estimates.

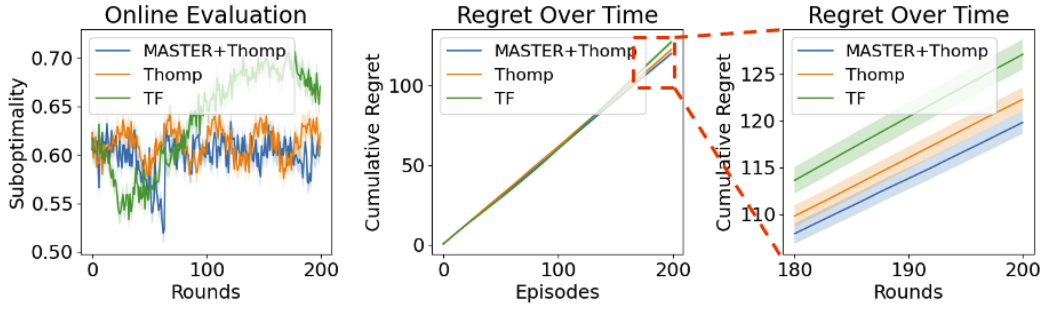

Figure 7: Suboptimality and Cumulative Regret Comparisons of Thompson sampling (TS), MASTER+TS, and transformer (TF) in High Non-stationary environments ( $b = 0.025$ ). Linear bandit with  $d = 32$ ,  $A = 10$ . Shading indicates the standard deviation of the regret estimates.

771 times of each instance are denoted by  $alg.s$  and  $alg.e$ , respectively. Among all scheduled instances,  
772 only the one with the lowest order remains active at any given time, producing an auxiliary value  $\tilde{r}_t$ .  
773 After each step, MALG updates the active instance based on observed rewards  $R_t$  from the environ-  
774 ment. All reinforcement learning algorithms in this framework produce a specific auxiliary value;  
775 in the LinUCB setting,  $\tilde{r}_t$  corresponds to a computed score that combines a reward estimate with an  
776 uncertainty term.

---

**Algorithm 1:** MALG (Multi-scale ALG)([Wei and Luo, 2021](#))

---

**Input:**  $n, \rho(\cdot)$

```

1 for  $\tau = 0, \dots, 2^n - 1$  do
2   for  $m = n, n - 1, \dots, 0$  do
3     if  $\tau$  is a multiple of  $2^m$  then
4       With probability  $\rho(2^n)/\rho(2^m)$ , schedule a new instance  $alg$  of ALG at scales  $2^m$ ;
5   Run the active instance  $alg$  to output  $\tilde{r}_\tau$ , select an action, and update with feedback.
```

---

777 MASTER (MALG with Stationarity Tests and Restarts) further enhances this process. It repeatedly  
778 tests for stability and performance using two key checks. The first test ensures that the average  
779 reward within any completed instance does not significantly exceed a threshold tied to  $\tilde{r}_t$ . The  
780 second test verifies that the difference between the auxiliary output  $\tilde{r}_t$  and observed rewards  $r_t$   
781 remains bounded on average. If either test fails, MASTER resets the process, ensuring that the  
782 algorithm remains robust under changing conditions.

---

**Algorithm 2:** MALG with Stationarity TEsts and Restarts (MASTER)(Wei and Luo, 2021)

---

**Input:**  $\hat{\rho}(\cdot)$  where  $\hat{\rho}(t) = 6(\log_2 T + 1) \log(T) \rho(t)$  ( $T$ : block length)

```

1 Initialize  $t \leftarrow 1$  for  $n = 0, 1, \dots$  do
2   Set  $t_n \leftarrow t$  and initialize an MALG (Algorithm 2) for the block  $[t_n, t_n + 2^n - 1]$ ;
3   while  $t < t_n + 2^n$  do
4     Run MALG to obtain prediction  $\tilde{r}_t$ , select action  $a_t$ , and receive reward  $R_t$ ;
5     Update MALG with feedback, and set  $U_t = \min_{\tau \in [t_n, t]} \tilde{r}_\tau$ ;
6     Perform Test 1 and Test 2 (see below);
7     Increment  $t \leftarrow t + 1$ ;
8     if either test returns fail then
9       restart from Line 2;
10 Test 1: If  $t = \text{alg}.e$  for some order- $m$  alg and  $\frac{1}{2^m} \sum_{\tau=\text{alg}.s}^{\text{alg}.e} R_\tau \geq U_t + 9\hat{\rho}(2^m)$ , return fail.
11 Test 2: If  $\frac{1}{t-t_n+1} \sum_{\tau=t_n}^t (\tilde{r}_\tau - r_\tau) \geq 3\hat{\rho}(t - t_n + 1)$ , return fail.

```

---

## C Proofs in Section 3

### C.1 Intermediate Statement

We provide the following intermediate statement to show Theorem 1.

**Theorem 6.** *Let Assumption 1 and 2 hold. Then for any small  $\varepsilon > 0$ , there exists an algorithm  $\text{alg}_{\hat{\theta}}$  introduced by a transformer with*

$$D \leq D_0 + 10, \quad M = \max\{M_0, 2\}, \quad L = L_0, \quad (12)$$

$$D' = \mathcal{O}(\max\{D'_0, T \log_2 T / \varepsilon\}), \quad \|\hat{\theta}\| = \tilde{\mathcal{O}}(C_0 + \sqrt{T \log_2 T / \varepsilon})$$

satisfying

$$|R_{\text{alg}_{\hat{\theta}}}(T) - R_{\overline{\text{alg}_{\varepsilon}}}(T)| = \tilde{\mathcal{O}} \left( T^2 \sqrt{\mathcal{R}_{\text{alg}_{\hat{\theta}}, \overline{\text{alg}_{\varepsilon}}}} \left( \sqrt{\frac{\log(\mathcal{N}_{\Theta} T / \delta)}{n}} \right) + \varepsilon AT \right). \quad (13)$$

### C.2 Proof of Theorem 1

As established in Wei and Luo (2021), for any reinforcement learning algorithm  $\text{alg}_E$ , the combination of MASTER and alg results in a stabilized version:  $\text{alg}_{\varepsilon}$ . The dynamic regret of  $\text{alg}_{\hat{\theta}}$  can then be expressed as

$$\mathfrak{R}_{\text{alg}_{\hat{\theta}}}(T) \leq \underbrace{\left| \mathfrak{R}_{\text{alg}_{\hat{\theta}}}(T) - \mathfrak{R}_{\overline{\text{alg}_{\varepsilon}}}(T) \right|}_{=: \mathfrak{A}} + \underbrace{\left| \mathfrak{R}_{\overline{\text{alg}_{\varepsilon}}}(T) \right|}_{=: \mathfrak{B}}. \quad (14)$$

$\mathfrak{A}$  can be obtained from Theorem 6, and  $\mathfrak{B}$  is bounded as follows:

$$\mathfrak{B} = \tilde{\mathcal{O}} \left( \min \left\{ \left( c_1 + \frac{c_2}{c_1} \right) \sqrt{JT}, \left( c_1^{2/3} + c_2 c_1^{-4/3} \right) \Delta^{1/3} T^{2/3} + \left( c_1 + \frac{c_2}{c_1} \right) \sqrt{T} \right\} \right),$$

where  $C(t) = c_1 t^{1/2} + c_2$  with  $c_1, c_2 > 0$  (Wei and Luo, 2021). Setting  $c_1 = 1$  and  $c_2 \ll 1$ , we obtain:

$$\mathfrak{B} = \tilde{\mathcal{O}} \left( \min \left\{ \sqrt{JT}, \Delta^{1/3} T^{2/3} + \sqrt{T} \right\} \right).$$

796

□

### C.3 Proof of Theorem 2

It suffices to prove that

$$T^2 \sqrt{\mathcal{R}_{\text{alg}_{\hat{\theta}}, \overline{\text{alg}_{\varepsilon}}}} \left( \sqrt{\frac{\log(\mathcal{N}_{\Theta} T / \delta)}{n}} + \sqrt{\varepsilon} \right) + \varepsilon AT = \tilde{\mathcal{O}}(\sqrt{T}).$$

799 According to Theorem 5, we have

$$\frac{\text{alg}_{\hat{\theta}}(a_t|D_{t-1}, s_t)}{\overline{\text{alg}}_E(a_t|D_{t-1}, s_t)} \leq e^\varepsilon.$$

800 Thus, the cumulative distribution ratio over  $T$  rounds satisfies

$$\mathcal{R}_{\text{alg}_{\hat{\theta}}, \overline{\text{alg}}_E} = e^{\varepsilon T}.$$

801 Since we assume  $\varepsilon \leq T^{-3}$ , it follows that

$$\mathcal{R}_{\text{alg}_{\hat{\theta}}, \overline{\text{alg}}_E} = \mathcal{O}(1).$$

802 Consequently, we have

$$T^2 \sqrt{\mathcal{R}_{\text{alg}_{\hat{\theta}}, \overline{\text{alg}}_E}} \cdot \sqrt{\varepsilon} + \varepsilon AT = \mathcal{O}(\sqrt{T}).$$

803 Next, following Vaart and Wellner (2023), there exist universal constants  $C_1$  and  $C_2$  such that

$$\mathcal{N}_\Theta = \mathcal{N}_\Theta((NT)^{-2}) \leq (2N^2T^2)^{C_1 V(C_2(NT)^{-2}, \Theta)}$$

804 where  $V(\varepsilon, \Theta)$  denotes the fat-shattering dimension of  $\Theta$ . Let  $V(\Theta)$  be the VC-dimension of  $\Theta$ ;  
 805 then, for any  $\varepsilon > 0$ , it holds that  $V(\varepsilon, \Theta) \leq V(\Theta)$  (Vaart and Wellner, 2023). Since  $\Theta$  is a finite  
 806 parameter class, there exists a constant  $C_3$  such that  $V(\varepsilon, \Theta) \leq V(\Theta) \leq C_3$  for all  $\varepsilon > 0$ . Therefore,  
 807 under the assumption that  $N \geq CT^3 \log T$ , we obtain:

$$\begin{aligned} T^2 \sqrt{\mathcal{R}_{\text{alg}_{\hat{\theta}}, \overline{\text{alg}}_E}} \sqrt{\frac{\log(\mathcal{N}_\Theta T/\delta)}{N}} &\leq T^2 \sqrt{\frac{\log(\mathcal{N}_\Theta T/\delta)}{N}} \\ &\leq T^2 \sqrt{\frac{(1 + 2C_1C_3) \log T + 2C_1C_3 \log N + \log(2^{C_1C_3}/\delta)}{N}} \\ &\leq T^2 \sqrt{\frac{\tilde{\mathcal{O}}(\log T)}{\mathcal{O}(T^3 \log T)}} \\ &= \tilde{\mathcal{O}}(\sqrt{T}) \end{aligned}$$

808 which completes the proof.  $\square$

#### 809 C.4 Proof of Theorem 5

810 Consider  $\mathbf{x}_t^{(i)} \in \mathbb{R}^d$ . As shown in Section D, a noncontinuous transformer (Definition 7) with

$$D = ((d+5)(n+1)+5), \quad M = 2, \quad L > 0, \quad D' = T \log_2 T/\varepsilon, \quad \|\theta\| = \tilde{\mathcal{O}}\left(\sqrt{T \log_2 T/\varepsilon}\right),$$

811 can approximate the MASTER algorithm. Treating any reinforcement learning algorithm that uses  
 812 MASTER as the expert algorithm  $\text{alg}_E$  in Theorem 5, the result follows directly from Assumption  
 813 2.  $\square$

#### 814 C.5 Proof of Theorem 6

815 By Theorem 5, we have

$$\begin{aligned} \log \frac{\text{alg}_{\hat{\theta}}(a_{t,k}|D_{t-1}, s_t)}{\overline{\text{alg}}_E(a_{t,k}|D_{t-1}, s_t)} &< \varepsilon \\ \Rightarrow \text{alg}_{\hat{\theta}}(a_{t,k}|D_{t-1}, s_t) &< e^\varepsilon \cdot \overline{\text{alg}}_E(a_{t,k}|D_{t-1}, s_t) \\ \Rightarrow |\text{alg}_{\hat{\theta}}(a_{t,k}|D_{t-1}, s_t) - \overline{\text{alg}}_E(a_{t,k}|D_{t-1}, s_t)| &< (e^\varepsilon - 1), \end{aligned}$$

816 where the last inequality uses the fact that  $\text{alg}(\cdot) \leq 1$ . With a slight abuse of notation, let  $r_{t,k}$  denote  
 817 the reward of the  $k$ -th action at round  $t$ . Since  $|r_{t,k}| \leq 1$  almost surely for all  $t \in [T]$ , we obtain the  
 818 policy imitation error between transformers and MASTER as follows:

$$\text{Policy Imitation Error} = \left| \sum_{t=1}^T \sum_{k=1}^A (\text{alg}_{\hat{\theta}}(a_{t,k}|D_{t-1}, s_t) - \overline{\text{alg}}_E(a_{t,k}|D_{t-1}, s_t)) r_{t,k} \right|$$

$$\begin{aligned}
&\leq \sum_{t=1}^T \sum_{k=1}^A |\text{alg}_{\hat{\theta}}(a_{t,k}|D_{t-1}, s_t) - \overline{\text{alg}}_{\mathcal{E}}(a_{t,k}|D_{t-1}, s_t)| \cdot |r_{t,k}| \\
&\leq \sum_{t=1}^T \sum_{k=1}^A (e^\varepsilon - 1) \\
&= (e^\varepsilon - 1)AT.
\end{aligned}$$

819 Finally, since  $\varepsilon > 0$  is small, we use the approximation

$$e^\varepsilon = 1 + \varepsilon + \mathcal{O}(\varepsilon^2),$$

820 and then the policy imitation error becomes  $\varepsilon AT$ .

821 Next, we leverage the result from [Lin et al. \(2024\)](#):

$$|\mathfrak{R}_{\text{alg}_{\hat{\theta}}}(T) - \mathfrak{R}_{\overline{\text{alg}}_{\mathcal{E}}}(T)| = \mathcal{O}\left(T^2 \sqrt{\mathcal{R}_{\text{alg}_{\hat{\theta}}, \overline{\text{alg}}_{\mathcal{E}}}} \left(\sqrt{\frac{\log(\mathcal{N}_{\Theta} T / \delta)}{N}} + \sqrt{\varepsilon_{\text{real}}}\right)\right) \quad (15)$$

822 where

$$\log \mathbb{E}_{\overline{D}_T \sim \mathbb{P}_{\text{alg}_0, \text{alg}_E}} \left[ \frac{\overline{\text{alg}}_E(\bar{a}_t|D_{t-1}, s_t)}{\text{alg}_{\hat{\theta}}(\bar{a}_t|D_{t-1}, s_t)} \right] \leq \varepsilon_{\text{real}}$$

823 for all  $t \in [T]$ . We extend this result to non-stationary settings to derive a bound for  $|\mathfrak{R}_{\text{alg}_{\hat{\theta}}}(T) - \mathfrak{R}_{\overline{\text{alg}}_{\mathcal{E}}}(T)|$ .

825 Suppose there are  $n_0 + 1$  orders of instances, and  $\text{alg}_E$  runs for  $T$  rounds. Let  $k_i \geq 0$  represent the  
826 number of rounds for order- $i$  instances, so that  $k_0 + k_1 + \dots + k_{n_0} = T$ . Define  $T_i$  as:

$$T_i := \{t_1^{(i)}, \dots, t_{k_i}^{(i)}\}, \quad |T_i| = k_i, \quad i \in \{0, \dots, n_0\}$$

827 which is the set of rounds during which order- $i$  instances are active. If  $k_i = 0$ , order- $i$  instances  
828 are inactive. If  $k_i > 0$ , one or more order- $i$  instances are active. Using Lemma 7, we know that  
829 running one instance during  $T_i$  yields a higher regret bound (as in (15)) than running zero or multiple  
830 instances in  $T_i$ . Furthermore, Theorem 6 guarantees that the regret for a reinforcement learning  
831 algorithm at  $T_i$  is bounded by  $\varepsilon A k_i$ . Thus, we have:

$$|\mathfrak{R}_{\text{alg}_{\hat{\theta}}}(T_i) - \mathfrak{R}_{\overline{\text{alg}}_{\mathcal{E}}}(T_i)| = \mathcal{O}\left(k_i^2 \sqrt{\mathcal{R}_{\text{alg}_{\hat{\theta}}, \overline{\text{alg}}_{\mathcal{E}}}} \left(\sqrt{\frac{\log(\mathcal{N}_{\Theta} k_i / \delta)}{N}} + \sqrt{\varepsilon_{\text{real}}}\right) + \varepsilon A k_i\right).$$

832 Summing over all  $T_i$ , we get:

$$\begin{aligned}
|\mathfrak{R}_{\text{alg}_{\hat{\theta}}}(T) - \mathfrak{R}_{\overline{\text{alg}}_{\mathcal{E}}}(T)| &\leq \sum_{i=0}^{n_0} |\mathfrak{R}_{\text{alg}_{\hat{\theta}}}(T_i) - \mathfrak{R}_{\overline{\text{alg}}_{\mathcal{E}}}(T_i)| \\
&\leq \sum_{i=0}^{n_0} |R_{\text{alg}_{\hat{\theta}}}(T_i) - R_{\overline{\text{alg}}_{\mathcal{E}}}(T_i)| \\
&= \mathcal{O}\left(\sum_{i=0}^{n_0} k_i^2 \sqrt{\mathcal{R}_{\text{alg}_{\hat{\theta}}, \overline{\text{alg}}_{\mathcal{E}}}} \left(\sqrt{\frac{\log(\mathcal{N}_{\Theta} k_i / \delta)}{N}} + \sqrt{\varepsilon_{\text{real}}}\right) + \varepsilon A k_i\right) \\
&\leq \mathcal{O}\left(\sum_{i=0}^{n_0} k_i^2 \sqrt{\mathcal{R}_{\text{alg}_{\hat{\theta}}, \overline{\text{alg}}_{\mathcal{E}}}} \left(\sqrt{\frac{\log(\mathcal{N}_{\Theta} T / \delta)}{N}} + \sqrt{\varepsilon_{\text{real}}}\right) + \varepsilon A k_i\right) \\
&\leq \mathcal{O}\left(\left(\sum_{i=0}^{n_0} k_i\right)^2 \sqrt{\mathcal{R}_{\text{alg}_{\hat{\theta}}, \overline{\text{alg}}_{\mathcal{E}}}} \left(\sqrt{\frac{\log(\mathcal{N}_{\Theta} T / \delta)}{N}} + \sqrt{\varepsilon_{\text{real}}}\right) + \sum_{i=0}^{n_0} \varepsilon A k_i\right) \\
&= \mathcal{O}\left(T^2 \sqrt{\mathcal{R}_{\text{alg}_{\hat{\theta}}, \overline{\text{alg}}_{\mathcal{E}}}} \left(\sqrt{\frac{\log(\mathcal{N}_{\Theta} T / \delta)}{N}} + \sqrt{\varepsilon_{\text{real}}}\right) + \varepsilon AT\right),
\end{aligned}$$

833 where the final inequality follows from the Cauchy–Schwarz inequality.

834 By Assumption 2, we have

$$\frac{\overline{\text{alg}}_E(\bar{a}_t | D_{t-1}, s_t)}{\text{alg}_{\hat{\theta}}(\bar{a}_t | D_{t-1}, s_t)} < e^\varepsilon.$$

835 Therefore,

$$\log \mathbb{E}_{\bar{D}_T \sim \mathbb{P}_{\text{alg}_0, \text{alg}_E}} \left[ \frac{\overline{\text{alg}}_E(\bar{a}_t | D_{t-1}, s_t)}{\text{alg}_{\hat{\theta}}(\bar{a}_t | D_{t-1}, s_t)} \right] \leq \varepsilon_{\text{real}} \leq \varepsilon.$$

836 Combining this with the result of Theorem 6 completes the proof.  $\square$

### 837 C.5.1 An auxiliary lemma

838 **Lemma 7** (Regret bound for multiple instances). *Let  $a, b, c, N, C_1, C_2 > 0$  with  $a + b = c$ . The*  
 839 *following bound holds:*

$$a^2 \left( \sqrt{\frac{\log(C_1 a)}{N}} + C_2 \right) + b^2 \left( \sqrt{\frac{\log(C_1 b)}{N}} + C_2 \right) \leq c^2 \left( \sqrt{\frac{\log(C_1 c)}{N}} + C_2 \right). \quad (16)$$

840 **Proof of Lemma 7.** Let  $0 < u < 1$  be such that  $a = uc$  and  $b = (1 - u)c$ . Substituting into (16),  
 841 we obtain:

$$u^2 \left( \sqrt{\frac{\log(C_1 uc)}{N}} + C_2 \right) + (1 - u)^2 \left( \sqrt{\frac{\log(C_1 (1 - u)c)}{N}} + C_2 \right) \leq c^2 \left( \sqrt{\frac{\log(C_1 c)}{N}} + C_2 \right).$$

842 Denoting  $G := \log(C_1 c)/N$ , we rewrite the inequality as:

$$u^2 \left( \sqrt{\log u + G} + C_2 \right) + (1 - u)^2 \left( \sqrt{\log(1 - u) + G} + C_2 \right) \leq \sqrt{G} + C_2. \quad (17)$$

843 Since  $0 < u < 1$ , we have  $\log u < 0$  and  $\log(1 - u) < 0$ . Substituting these into (17), we obtain:

$$u^2 + (1 - u)^2 \leq 1,$$

844 which follows directly from  $0 < u < 1$ , as  $u^2 + (1 - u)^2 = 1 - 2u(1 - u) < 1$ .  $\square$

## 845 D Proofs in Section 4

### 846 D.1 Structural Approximation

847 To match the order- $n$  instance length as described in Appendix B, we consider a single input matrix  
 848  $\mathbf{H} = [\mathbf{h}_1, \dots, \mathbf{h}_{2^n}] \in \mathbb{R}^{d \times 2^n}$ , where  $\{\mathbf{h}_i\}_{i=1}^{2^n} \subset \mathbb{R}^d$ . This matrix is then extended to  $\mathcal{H} \in \mathbb{R}^{D \times 2^n}$   
 849 defined as  $\mathcal{H} := [\mathbf{H}^{(0)}; \dots; \mathbf{H}^{(n)}; \mathbf{H}^*] \in \mathbb{R}^{D \times 2^n}$  (Figure 8) where  $D := ((d + 5)(n + 1) + 5)$ ,  
 850 and  $\mathbf{H}^*$  contains auxiliary entries for approximation purposes. Here,  $\mathbf{H}^{(i)} := [\mathbf{h}_1^{(i)} \dots \mathbf{h}_{2^n}^{(i)}]$  and  
 851  $\mathbf{h}_t^{(i)} = [\mathbf{h}_t; 2^i, 0, 0, 0, 0]$  where the four auxiliary entries capture the order information. Details of  
 852 each entry are given in (21) and (22). Once  $\mathcal{H}$  is defined, the transformer produces the output  
 853  $\bar{\mathcal{H}} \in \mathbb{R}^{D \times 2^n}$ . It's worth noting that even if the input length  $T$  is not exactly  $2^n$ , the transformer can  
 854 still perform operations as in MASTER and generate a length- $T$  output by selecting the smallest  $2^n$   
 855 greater than  $T$  and running the algorithm for  $T$  rounds.

856 We begin by defining functions  $\sigma_1$  and  $\sigma_2$  to replicate the MALG operation, where  $\sigma_1$  stochastically  
 857 schedules instances for each order, and  $\sigma_2$  selects the instance with the lowest order to remain active  
 858 in each round.

859 **Definition 4** ( $\sigma_1$ ). *Given a non-increasing function  $\rho : [2^n] \rightarrow \mathbb{R}$ , we define  $\sigma_1^\rho : \mathbb{R}^{D \times 2^n} \rightarrow \mathbb{R}^{D \times 2^n}$*   
 860 *as*

$$\sigma_1^\rho(\mathcal{H}) = \left[ \sigma_1(\mathbf{H}^{(0)}, 0, n, \rho); \dots; \sigma_1(\mathbf{H}^{(n)}, n, n, \rho) \right],$$

861 where for each  $i \in \{0, \dots, n\}$

$$\sigma_1(\mathbf{H}^{(i)}, i, n, \rho) = \left\{ \mathbf{h}_j^{(i)} \cdot \mathbf{B} \left( \frac{\rho(2^n)}{\rho(2^i)} \right) \mid j \in \{t, t + 1, \dots, t + 2^i - 1\}, t \bmod 2^i = 1 \right\} \in \mathbb{R}^{D \times 2^n}.$$

862 Here,  $\mathbf{B}(k)$  is a Bernoulli random variable with parameter  $k$ , meaning  $\mathbf{B}(k) = 1$  with probability  
 863  $k \leq 1$  and  $\mathbf{B}(k) = 0$  otherwise.

Using  $\sigma_1$ , multiple instances can be scheduled simultaneously (represented as the blueish blocks in Figure 8). Since only one instance can run in the environment at any given time, we define  $\sigma_2$  to select the instance with the lowest order at each time  $t$ .

We denote  $\mathbf{h}_t := [\mathbf{h}_t^{(0)}; \dots; \mathbf{h}_t^{(n)}] \in \mathbb{R}^D$  for each  $t \in [2^n]$ , so that  $\mathcal{H} = [\mathbf{h}_1, \dots, \mathbf{h}_{2^n}]$ . Then,  $\sigma_2$  is defined as follows.

**Definition 5** ( $\sigma_2$ ). We define  $\sigma_2 : \mathbb{R}^{D \times 2^n} \rightarrow \mathbb{R}^{D \times 2^n}$  by

$$\sigma_2(\mathcal{H}) = [\mathbf{h}'_1, \dots, \mathbf{h}'_{2^n}],$$

$$\mathbf{h}'_t = [\mathbf{0}; \dots; \mathbf{0}; \mathbf{h}_t^{(k)}; \mathbf{0}; \dots; \mathbf{0}; *; *; *; *; *] \quad (\mathbf{h}_t^{(0)}, \dots, \mathbf{h}_t^{(k-1)} = \mathbf{0}, \mathbf{h}_t^{(k)} \neq \mathbf{0}, 0 \leq k \leq n)$$

to reproduce the uniqueness of an instance scheduled at every moment in MALG. Here,  $*$ s denote the last five entries of  $\mathbf{h}_t$ .

After passing through  $\sigma_2$ , only one instance remains active at each time  $t$ , and this active instance has the lowest order among all scheduled instances. See the reddish blocks in Figure 8 for illustration.

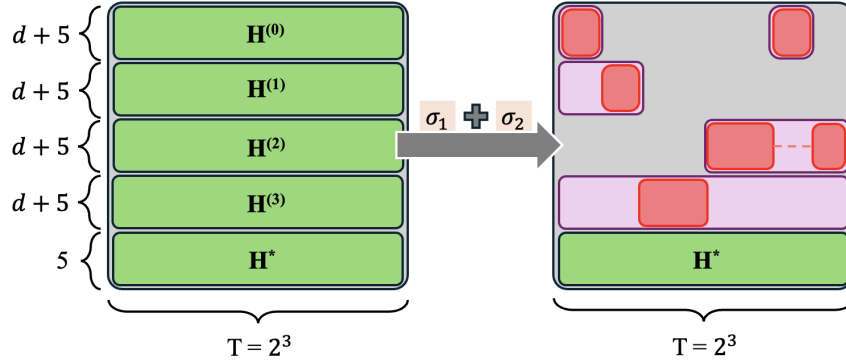

Figure 8: Illustration of  $\mathcal{H}$  when  $n = 3$ . Purplish blocks represent instances scheduled by  $\sigma_1$ , while reddish blocks represent the active instances selected by  $\sigma_2$ . Reddish blocks connected by a dashed line are concatenated.

To approximate the stationary tests (**Test 1** and **Test 2**) in Algorithm 2, we define the following:

**Definition 6** (TEST). TEST represents the stationary tests in MASTER, involving two functions **test1** and **test2** that map from  $\mathbb{R}^D \times \mathbb{R}^{D \times 2^n}$  to  $\mathbb{R}$ . Given  $\hat{\rho}$  defined in Algorithm 2 and an active instance in  $\mathbf{h}_t$  of order  $m$ , where  $\mathbf{h}_t$  contains  $m, t, U_t, \tilde{r}_t$ , and  $r_t$ , we define:

$$\text{test1}_{\hat{\rho}}(\mathbf{h}_t, \mathcal{H}) = \begin{cases} 1, & \text{if some order-}m \text{ alg ends and } \frac{1}{2^m} \sum_{\tau=t-2^m+1}^t r_\tau < U_t + 9\hat{\rho}(2^m), \\ 0, & \text{otherwise} \end{cases}$$

$$\text{test2}_{\hat{\rho}}(\mathbf{h}_t, \mathcal{H}) = \begin{cases} 1, & \text{if } \frac{1}{t-t_n+1} \sum_{\tau=1}^t (\tilde{r}_\tau - r_\tau) < 3\hat{\rho}(t - t_n + 1). \\ 0, & \text{otherwise} \end{cases}$$

TEST is then defined as:

$$\text{TEST}_{\hat{\rho}}(\mathbf{h}_t, \mathcal{H}) := \text{test1}(\mathbf{h}_t, \mathcal{H}) \cdot \text{test2}(\mathbf{h}_t, \mathcal{H}) = \begin{cases} 1, & \text{if } \text{test1}(\mathbf{h}_t) = \text{test2}(\mathbf{h}_t) = 1 \\ 0, & \text{otherwise} \end{cases}.$$

Finally, we define the noncontinuous transformer. Since the stationary tests are included in the noncontinuous transformer and it stops processing the remaining sequence if any test fails, we define a transformer module that processes each element (not the whole sequence), performs the tests, and then concatenates the results.

884 **Definition 7** (Noncontinuous Transformer). For  $t \in [2^n]$ , We first denote  $\mathbf{h}_t^*$  as

$$\mathbf{h}_t^* = \left( \text{MLP}_{\theta_{\text{mlp}}^{(L)}} \circ \text{Attn}_{\theta_{\text{attn}}^{(L)}} \right) \circ \dots \circ \left( \text{MLP}_{\theta_{\text{mlp}}^{(1)}} \circ \text{Attn}_{\theta_{\text{attn}}^{(1)}} \right) (\mathbf{h}_t, \mathcal{H}) \in \mathbb{R}^D.$$

885 where parameters  $\theta_{\text{attn}}^{(\ell)} = \{\mathbf{V}_m^{(\ell)}, \mathbf{Q}_m^{(\ell)}, \mathbf{K}_m^{(\ell)}\}_{m \in [2^n]} \subset \mathbb{R}^{D \times D}$  and  $\theta_{\text{mlp}}^{(\ell)} = \{(\mathbf{W}_1^{(\ell)}, \mathbf{W}_2^{(\ell)})\}_{m \in [2^n]} \subset$   
 886  $\mathbb{R}^{D' \times D} \times \mathbb{R}^{D \times D'}$ . After processing  $\mathbf{h}_t$ , the model interacts with the environment, observes the  
 887 reward, and inserts it into the sequence:  $\mathbf{h}_t^* \rightarrow \tilde{\mathbf{h}}_t$  ((21) and (22)). By concatenating  $\tilde{\mathbf{h}}_{t \in [2^n]}$ , we  
 888 define the  $L$ -layer noncontinuous transformer  $\mathcal{TF}_\theta : \mathbb{R}^{D \times 2^n} \rightarrow \mathbb{R}^{D \times 2^n}$  as

$$\mathcal{TF}_\theta = \mathcal{TF}_\theta^{(2^n)} \quad (18)$$

$$\mathcal{TF}_\theta^{(T)}(\mathcal{H}) = \tilde{\mathcal{H}}^{(T)} \in \mathbb{R}^{D \times 2^n} \quad (T \in [2^n]) \quad (19)$$

889 where  $\tilde{\mathcal{H}}^{(T)} := [\tilde{\mathbf{h}}_1, \dots, \tilde{\mathbf{h}}_T, \mathbf{T}_T \mathbf{h}_{T+1}, \dots, \mathbf{T}_T \mathbf{h}_{2^n}] \in \mathbb{R}^{D \times 2^n}$ . Here,  $\mathbf{T}_T \in \mathbb{R}^{D \times D}$  denotes the test  
 890 matrix at time  $T$ :

$$\mathbf{T}_T := \text{diag}(\overbrace{1, \dots, 1}^{\times(n+1)}, \text{TEST}, \text{TEST}, \text{TEST}, \text{TEST}, 1, 1, \text{TEST}, \text{TEST}, \text{TEST}) \quad (20)$$

$d+1$

891 where  $\text{TEST} = \text{TEST}(\bar{\mathbf{h}}_T, \mathcal{H}^{(T)})$ . Here, order information  $\sum_{\tau=t-2^i+1}^{t-1} r_\tau$ ,  $\sum_{k=0}^{i-1} \tilde{r}_t^{(k)}$ ,  $\tilde{r}_t^{(i)}$ , historical  
 892 data  $\sum_{\tau=1}^{t-1} r_\tau$ ,  $\sum_{\tau=1}^{t-1} \tilde{r}_\tau$ ,  $U_{t-1}$ , and **rand** in (21) and 22 are reset when  $\text{TEST} = 0$ .  $\tilde{r}_t^{(i)}$  denotes the  
 893 auxiliary value generated at order  $i$ .

894 **Interaction with the environment** To illustrate the transformer's interaction with the environ-  
 895 ment, we consider the following:

$$\mathbf{h}_t^{(i)} = \begin{bmatrix} \mathbf{x}_t^{(i)} \\ 2^i \\ \sum_{\tau=t-2^i+1}^{t-1} r_\tau \\ 0 \\ \sum_{k=0}^{i-1} \tilde{r}_t^{(k)} \\ \tilde{r}_t^{(i)} \end{bmatrix} \xrightarrow[\text{Interact with the environment}]{\text{Processed by the module}} \begin{bmatrix} \bar{\mathbf{x}}_t^{(i)} \\ 2^i \\ \sum_{\tau=t-2^i+1}^t r_\tau \\ \text{rand} \\ \sum_{k=0}^{i-1} \tilde{r}_t^{(k)} \\ \tilde{r}_t^{(i)} \end{bmatrix} = \bar{\mathbf{h}}_t^{(i)}, \quad (21)$$

$$\mathbf{h}_t = \begin{bmatrix} \mathbf{h}_t^{(0)} \\ \vdots \\ \mathbf{h}_t^{(n)} \\ 2^n \\ t \\ \sum_{\tau=1}^{t-1} r_\tau \\ \sum_{\tau=1}^{t-1} \tilde{r}_\tau \\ U_{t-1} \end{bmatrix} \xrightarrow[\text{Interact with the environment}]{\text{Processed by the module}} \begin{bmatrix} \bar{\mathbf{h}}_t^{(0)} \\ \vdots \\ \bar{\mathbf{h}}_t^{(n)} \\ 2^n \\ t \\ \sum_{\tau=1}^t r_\tau \\ \sum_{\tau=1}^t \tilde{r}_\tau \\ U_t \end{bmatrix} = \bar{\mathbf{h}}_t. \quad (22)$$

896 Here,  $\sum_{\tau=1}^0 r_\tau = 0$  and  $r_\tau = 0$  for  $\tau \leq 0$ . The **rand** entry is a random number generated by  
 897 the transformer. The vectors  $\mathbf{x}_t^{(i)} \in \mathbb{R}^d$  are used for in-context learning, and  $\bar{\mathbf{x}}_t^{(i)}$  represents their  
 898 processed forms. For instance, these vectors can encode action choices in bandit problems (Lin  
 899 et al., 2024).

900 Each vector entry captures cumulative information or constants relevant to the model's operations  
 901 up to time  $t$ . After passing the sequence through the MLP+Attention module, the module schedules  
 902 certain orders at each time  $t$ , setting all other instances to  $\mathbf{0}$ . The  $\sigma_2$  operation ensures that only one  
 903 instance is active at a time by selecting the instance with the lowest order and setting all others to  $\mathbf{0}$ . If  
 904 the active instance is order  $q(\leq n)$ , then  $\tilde{r}_t^{(q)}$  is assigned as  $\tilde{r}_t$  at time  $t$ , and  $U_t = \min\{U_{t-1}, \tilde{r}_t^{(q)}\}$ .  
 905 Finally, the module interacts with the environment, observes reward  $R_t$ , and updates the tensor  
 906 accordingly.



907 **Notation with regard to the input sequence** To avoid potential confusion, the notations defined  
 908 above are summarized below:

- 909 •  $\mathbf{h}_t \in \mathbb{R}^d$ : The  $t$ -th element of the input sequence.
- 910 •  $\mathbf{H} = [\mathbf{h}_1, \dots, \mathbf{h}_{2^n}] \in \mathbb{R}^{D \times 2^n}$ : The input sequence as a matrix.
- 911 •  $\mathcal{H} = [\mathbf{H}^{(0)}; \dots; \mathbf{H}^{(n)}; \mathbf{H}^*] = [\mathbf{h}_1 \dots \mathbf{h}_{2^n}] \in \mathbb{R}^{D \times 2^n}$ : The extended input sequence, where  
 912  $\mathbf{H}^{(i)}$  denotes the order- $i$  sequence.
- 913 •  $\mathbf{h}_t = [\mathbf{h}_t^{(0)}; \dots; \mathbf{h}_t^{(n)}; \mathbf{h}_t^*] \in \mathbb{R}^D$ : The  $t$ -th vector of the extended sequence.
- 914 •  $\mathbf{h}'_t = [\mathbf{0}; \dots; \mathbf{0}; \mathbf{h}_t^{(k)}; \mathbf{0}; \dots; \mathbf{0}; \mathbf{h}_t^*] \in \mathbb{R}^D$ : The  $t$ -th vector of the extended input after  
 915 being processed by  $\sigma_2$ . Here,  $k$  represents the lowest nonzero order.
- 916 •  $\mathbf{h}_t^*$ : The result of processing  $\mathbf{h}_t$  by the noncontinuous transformer module.
- 917 •  $\bar{\mathbf{h}}_t$ : The transformer output after interacting with the environment.

918 **Restart** The restart mechanism (line 9 of Algorithm 2) is built into the revised transformer. If  
 919 no tests fail, the matrices  $\mathbf{T}_T$  ( $T \in [2^n]$ ) remain identity matrices, and the sequence is processed  
 920 as usual. If a test fails at time  $T$ , the matrices  $\mathbf{T}_T$  ( $T \in [2^n]$ ) modify the states  $\bar{\mathbf{h}}_{T+1}, \dots, \bar{\mathbf{h}}_{2^n}$ .  
 921 They keep the first  $D - 7$  elements—containing  $\mathbf{x}_T$ ,  $T$ ,  $2^n$ , and  $2^i$ —and set the remaining seven  
 922 elements to zero. This ensures that when a test fails, all earlier information is erased while the key  
 923 components are retained.

924 **Rollout** The noncontinuous transformer’s architecture is more complex than the classic version,  
 925 so we outline its input-output flow.

926 Starting with an input sequence  $\mathbf{H} \in \mathbb{R}^{D \times 2^n}$ , we extend it to  $\mathcal{H} = [\mathbf{H}^{(0)}; \dots; \mathbf{H}^{(n)}; \mathbf{H}^*] \in \mathbb{R}^{D \times 2^n}$ ,  
 927 where submatrices  $\mathbf{H}^{(i)}$  and  $\mathbf{H}^{(j)}$  are only different in several entries to record order information.

928  $\mathcal{H}$  is passed through  $\sigma_1$  and  $\sigma_2$ :  $\sigma_1$  schedules instances for each order, and  $\sigma_2$  activates only the  
 929 instance with the lowest order at any given time  $t$ . As a result, at each time  $t$ , only one instance is  
 930 active, and the active instance may come from a different order at each time step.

931 Next, each element in the sequence is processed by the traditional MLP+Attention module. The  
 932 module uses this information to interact with the environment, collects the reward, and inserts it  
 933 into the sequence:  $\mathbf{h}_t^* \rightarrow \bar{\mathbf{h}}_t$  ((21) and (22)). The updated sequence  $\bar{\mathbf{h}}_t$  is evaluated by TEST, which  
 934 performs stationary tests. If the tests pass, the block remains unchanged; otherwise, the remaining  
 935 block entries are set to zero, keeping only essential information. This effectively ends the current  
 936  $2^n$ -length block and starts a new  $2^n$ -length block (line 2, Algorithm 2). On restart, variables like  $R_t$   
 937 and  $f_t$  are reinserted at their appropriate positions, following the same procedure. After processing  
 938 the entire sequence, the final tensor  $\bar{\mathcal{H}}$  is produced. By gathering the rewards from all orders at each  
 939  $t$  (only one reward is nonzero at a given time), the resulting sequence  $\bar{\mathcal{H}}$  serves as the output of the  
 940 noncontinuous transformer, containing cumulative rewards up to time  $2^n$ .

## 941 D.2 Approximation of WS (Proposition 3)

942 We divide the proof into three parts: approximating random number generation,  $\sigma_1$ , and  $\sigma_2$ .  
 943 Throughout this section, we denote the ReLU activation function by  $\sigma(\cdot)$ .

### 944 D.2.1 Approximating random number generation

945 We start by approximating  $\mathbb{1}_{>0}[\cdot]$ . According to the definition of the ReLU function, we have

$$\sigma(kx) - \sigma(kx - 1) = \begin{cases} 0, & x \leq 0 \\ kx, & 0 < x \leq \frac{1}{k} \\ 1, & x > \frac{1}{k} \end{cases}.$$

946 When  $k \rightarrow \infty$ , it approximates  $\mathbb{1}[x] = \begin{cases} 0, & x \leq 0 \\ 1, & x > 0 \end{cases}.$

947 We denote  $z_k := \mathbf{x}_{k,0}$  and  $P_z(z)$  being the cumulative distribution function (CDF) of  $\{z_1, \dots, z_{2^n}\}$ .  
 948 Following the proof in [Hataya and Imaizumi \(2024\)](#), we construct a 2-head attention layer to ap-  
 949 proximate the CDF.

950 From the approximation of  $\mathbb{1}[\cdot]$ ,  $P_z(t) = 1/2^n \sum_{k=1}^{2^n} \mathbb{1}[\mathbf{x}_{k,0} \leq t]$  can be approximated by sum of  
 951 ReLU functions as

$$\hat{P}_z(t) \approx \frac{1}{2^n} \sum_{k=1}^{2^n} \{\sigma(k(t - x)) - \sigma(k(t - x) - 1)\}$$

952 where  $k$  is sufficiently large. Suppose the vector in formula 21 and 22 (left) is one of the input  $\mathbf{h}_t$ .  
 953 By selecting  $\{\mathbf{Q}_{1,2}, \mathbf{K}_{1,2}, \mathbf{V}_{1,2}\}$  such that

$$\mathbf{Q}_1 \mathbf{h}_i = \begin{bmatrix} k\mathbf{x}_{i,0} \\ -1 \\ 0 \\ \mathbf{0} \end{bmatrix}, \quad \mathbf{Q}_2 \mathbf{h}_i = \begin{bmatrix} k\mathbf{x}_{i,0} \\ -1 \\ -1 \\ \mathbf{0} \end{bmatrix}, \quad \mathbf{K}_1 \mathbf{h}_i = \mathbf{K}_2 \mathbf{h}_i = \begin{bmatrix} 1 \\ k\mathbf{x}_{i,0} \\ 1 \\ \mathbf{0} \end{bmatrix},$$

954

$$\mathbf{V}_1 \mathbf{h}_i = \begin{bmatrix} 1 \\ \mathbf{0} \end{bmatrix}, \quad \mathbf{V}_2 \mathbf{h}_i = \begin{bmatrix} -1 \\ \mathbf{0} \end{bmatrix},$$

955 we have

$$\sum_{m=1}^2 \sigma(\langle \mathbf{Q}_m \mathbf{h}_j, \mathbf{K}_m \mathbf{h}_i \rangle) \mathbf{V}_m \mathbf{h}_i = \sigma(k(\mathbf{x}_{j,0} - \mathbf{x}_{i,0})) - \sigma(k(\mathbf{x}_{j,0} - \mathbf{x}_{i,0}) - 1).$$

956 Therefore, the output is

$$\tilde{\mathbf{h}}_i = \mathbf{h}_i + \frac{1}{2^n} \sum_{j=1}^{2^n} \sum_{m=1}^2 \sigma(\langle \mathbf{Q}_m \mathbf{h}_i, \mathbf{K}_m \mathbf{h}_i \rangle) \mathbf{V}_m \mathbf{h}_i = \begin{bmatrix} \text{rand} \\ \vdots \end{bmatrix}$$

957 where  $\text{rand} = \hat{P}_z(\mathbf{x}_{i,0})$  can be regarded as a random variable sampled from  $\mathcal{U}(0, 1)$ . □

## 958 D.2.2 Approximating $\sigma_1$

959 **Step 1. Generating Bernoulli masks.** Define Bernoulli Masks as  $\mathbf{B}_{i,t} = \mathbb{1}[\text{rand}_{i,t} \leq$   
 960  $\rho(2^n)/\rho(2^i)]$ . We consider a random number  $\text{rand}_{i,t} \in \mathbb{R}$  at order  $i$  and time  $t$ , and  $\text{rand}_{i,t}, \rho(\cdot) \in$   
 961  $[0, 1]$ . Following the approach in Step 1, we begin by considering the input  $\mathbf{h}_t^{(i)}$ . This input includes  
 962  $\text{rand}_{i,t}, 2^i, 2^n$ , and we also assume that  $\rho(2^i)$  and  $\rho(2^n)$  are added to  $\mathbf{h}_t^{(i)}$  through  $\rho(\cdot)$ . In this case,  
 963 a two-layer MLP can implement Bernoulli Masks.

964 First, consider the function  $f(x, y) = x \cdot y \in \mathbb{R}$ . For  $x, y \in [0, 1]$ , dividing the domain  $[0, 1] \times [0, 1]$   
 965 into  $\lfloor 1/\epsilon \rfloor$  segments allows us to express it as:

$$\mathbf{W} \begin{bmatrix} x \\ y \end{bmatrix} + \mathbf{b} = \sum_{k,l=1}^n \alpha_{k,l} x + \beta_{k,l} y + \gamma_{k,l}.$$

966 This form can approximate  $f$  using an MLP. Based on this strategy, the two-layer MLP is constructed  
 967 as follows:

$$\begin{aligned} z_1 &= \sigma(\mathbf{W}_1 \mathbf{h}_t^{(i)} + \mathbf{b}_1) \\ &= \sigma \left( \begin{bmatrix} k_2 (\rho(2^n) - (\alpha_{1,1} \text{rand}_{i,t} + \beta_{1,1} \rho(2^i) + \gamma_{1,1})) \\ \vdots \\ k_2 (\rho(2^n) - (\alpha_{\lfloor \frac{1}{\sqrt{\epsilon}} \rfloor, \lfloor \frac{1}{\sqrt{\epsilon}} \rfloor} \text{rand}_{i,t} + \beta_{\lfloor \frac{1}{\sqrt{\epsilon}} \rfloor, \lfloor \frac{1}{\sqrt{\epsilon}} \rfloor} \rho(2^i) + \gamma_{\lfloor \frac{1}{\sqrt{\epsilon}} \rfloor, \lfloor \frac{1}{\sqrt{\epsilon}} \rfloor})) \\ k_2 (\rho(2^n) - (\alpha_{1,1} \text{rand}_{i,t} + \beta_{1,1} \rho(2^i) + \gamma_{1,1})) - 1 \\ \vdots \\ k_2 (\rho(2^n) - (\alpha_{\lfloor \frac{1}{\sqrt{\epsilon}} \rfloor, \lfloor \frac{1}{\sqrt{\epsilon}} \rfloor} \text{rand}_{i,t} + \beta_{\lfloor \frac{1}{\sqrt{\epsilon}} \rfloor, \lfloor \frac{1}{\sqrt{\epsilon}} \rfloor} \rho(2^i) + \gamma_{\lfloor \frac{1}{\sqrt{\epsilon}} \rfloor, \lfloor \frac{1}{\sqrt{\epsilon}} \rfloor})) - 1 \end{bmatrix} \right), \end{aligned}$$

968 where  $\mathbf{W}_1 \in \mathbb{R}^{2\lceil 1/\varepsilon \rceil \times D}$ . The output is then processed by another layer:

$$\begin{aligned} \mathbf{W}_2 \mathbf{z}_1 + \mathbf{b}_2 &= \sigma \left( k_2 (\rho(2^n) - \sum_{k,l=1}^n (\alpha_{k,l} \mathbf{rand}_{i,t} + \beta_{k,l} \rho(2^i) + \gamma_{k,l})) \right) \\ &\quad - \sigma \left( k_2 (\rho(2^n) - \sum_{k,l=1}^n (\alpha_{k,l} \mathbf{rand}_{i,t} + \beta_{k,l} \rho(2^i) + \gamma_{k,l})) - 1 \right) \\ &\approx \sigma \left( k_2 (\rho(2^n) - \mathbf{rand} \cdot \rho(2^i)) \right) - \sigma \left( k_2 (\rho(2^n) - \mathbf{rand} \cdot \rho(2^i)) - 1 \right) \\ &\longrightarrow \begin{cases} 1, & \mathbf{rand}_{i,t} \leq \frac{\rho(2^n)}{\rho(2^i)}, \\ 0, & \mathbf{rand}_{i,t} > \frac{\rho(2^n)}{\rho(2^i)}. \end{cases} \quad (k_2 \rightarrow \infty), \quad \mathbf{W}_2 \in \mathbb{R}^{1 \times 2\lceil 1/\varepsilon \rceil}. \end{aligned}$$

969 The hidden dimensions of  $\mathbf{W}_1, \mathbf{W}_1$  are  $\mathcal{O}(1/\varepsilon)$ . If the input is expanded from  $\mathbf{h}_t^{(i)}$  to  $\mathbf{H}^{(i)}$ , the  
 970 hidden dimensions increase to  $\mathcal{O}(2^n/\varepsilon)$ . Further expand further to  $\mathcal{H}$ , the hidden dimensions  
 971 of  $\mathbf{W}_1, \mathbf{W}_1$  become  $\mathcal{O}(n2^n/\varepsilon) = \mathcal{O}(T \log_2 T/\varepsilon)$ . The operator norms  $\|\mathbf{W}_1\|_{\text{op}}, \|\mathbf{W}_1\|_{\text{op}}$  scale as  
 972  $\mathcal{O}(\sqrt{T \log_2 T/\varepsilon})$ . Finally, by taking  $k_2 \rightarrow \infty$ , the error approaches zero.

973 **Step 2: Generating block masks.** By setting  $\mathbf{rand}_{i,t} = \dots = \mathbf{rand}_{i,t+2^i-1}$  ( $t \equiv 1 \pmod{2}$ ), we  
 974 have  $\mathbf{B}_{i,t} = \dots = \mathbf{B}_{i,t+2^i-1}$  ( $t \equiv 1 \pmod{2}$ ). Since the output of Bernoulli masks can be expressed  
 975 as  $\mathcal{H} := [\mathbf{h}_1 \dots \mathbf{h}_{2^n}] \in \mathbb{R}^{D \times 2^n}$ , where for  $t \in [2^n]$ :

$$\mathbf{h}_t = \begin{bmatrix} \mathbf{h}_t^{(0)} \\ \vdots \\ \mathbf{h}_t^{(n)} \\ \star \end{bmatrix}, \quad \mathbf{h}_t^{(0)} = \begin{bmatrix} \mathbf{x}_t^{(0)} \\ 0 \\ 0 \\ \mathbf{B}_{0,t} \\ 0 \\ f_t^{(0)} \end{bmatrix}, \quad \mathbf{h}_t^{(1)} = \begin{bmatrix} \mathbf{x}_t^{(1)} \\ 0 \\ 0 \\ \mathbf{B}_{1,t} \\ f_t^{(0)} \\ f_t^{(1)} \end{bmatrix}, \quad \dots, \quad \mathbf{h}_t^{(n)} = \begin{bmatrix} \mathbf{x}_t^{(n)} \\ 0 \\ 0 \\ \mathbf{B}_{n,t} \\ \sum_{p=0}^{n-1} f_t^{(p)} \\ f_t^{(n)} \end{bmatrix},$$

976 we choose  $\{\mathbf{Q}_m, \mathbf{K}_m, \mathbf{V}_m\}_{m \in \{0, \dots, n\}}$  such that for tokens  $\mathbf{h}_t$ ,

$$\mathbf{Q}_m \mathbf{h}_t = \begin{bmatrix} t \\ 1 \\ \mathbf{B}_{m,t} \\ -1 \end{bmatrix}, \quad \mathbf{K}_m \mathbf{h}_k = \begin{bmatrix} -1 \\ k \\ 1 \\ 0.5 \end{bmatrix}, \quad \mathbf{V}_m \mathbf{h}_k = [\mathbf{0}; \dots; \mathbf{0}; \mathbf{h}_k^{(m)}; \mathbf{0}; \dots; \mathbf{0}]$$

977 In this way, with  $k < t$  we have

$$\sum_{m=0}^n \mathbb{1}_{>0} [\langle \mathbf{Q}_m \mathbf{h}_t, \mathbf{K}_m \mathbf{h}_k \rangle] \mathbf{V}_m \mathbf{h}_k = \mathbf{0},$$

978 and with  $k = t$  we have

$$\sum_{m=0}^n r(\langle \mathbf{Q}_m \mathbf{h}_t, \mathbf{K}_m \mathbf{h}_t \rangle) \mathbf{V}_m \mathbf{h}_t = \sum_{m=0}^n \mathbb{1}_{>0} [\mathbf{B}_{m,t} - 0.5] \begin{bmatrix} \mathbf{0} \\ \vdots \\ \mathbf{0} \\ \mathbf{h}_t^{(m)} \\ \mathbf{0} \\ \vdots \\ \mathbf{0} \end{bmatrix} = \begin{bmatrix} \mathbf{B}_{0,t} \mathbf{h}_t^{(0)} \\ \vdots \\ \mathbf{B}_{n,t} \mathbf{h}_t^{(n)} \end{bmatrix}.$$

979 Finally, by referring to the approximation of  $\mathbb{1}_{>0}[\cdot]$  (D.2.1), we note that this indicator function can  
 980 be approximated using two ReLU functions. Consequently, the block mask can be approximated by  
 981 a  $2(n+1)$ -head masked attention layer. By setting  $1/\varepsilon = 4(n+1)^2$ , we have  $M = \mathcal{O}(1/\sqrt{\varepsilon})$

982 Combining this block mask with the random number generation and the Bernoulli mask completes  
 983 the proof.  $\square$

984 **D.2.3 Approximating  $\sigma_2$**

985 Based on the output of  $\sigma_1$ , we can express the input of  $\sigma_2$  as  $\mathcal{H} := [\mathfrak{h}_1 \cdots \mathfrak{h}_{2^n}] \in \mathbb{R}^{D \times 2^n}$ , where for  
 986  $t \in [2^n]$ :

$$\mathfrak{h}_t = \begin{bmatrix} \mathbf{h}_t^{(0)} \\ \vdots \\ \mathbf{h}_t^{(n)} \\ \star \end{bmatrix}, \quad \mathbf{h}_t^{(0)} = \begin{bmatrix} \mathbf{x}_t^{(0)} \\ 0 \\ 0 \\ 0 \\ f_t^{(0)} \end{bmatrix}, \quad \mathbf{h}_t^{(1)} = \begin{bmatrix} \mathbf{x}_t^{(1)} \\ 0 \\ 0 \\ f_t^{(0)} \\ f_t^{(1)} \end{bmatrix}, \quad \dots, \quad \mathbf{h}_t^{(n)} = \begin{bmatrix} \mathbf{x}_t^{(n)} \\ 0 \\ 0 \\ \sum_{p=0}^{n-1} f_t^{(p)} \\ f_t^{(n)} \end{bmatrix}.$$

987 From the definition of  $\sigma_1$ , we know that some  $\mathbf{h}_t^{(i)}$  values are nonzero, while others are zero. If we  
 988 assume  $i_1 < \dots < i_k$  ( $0 < k \leq n$ ) such that  $\mathbf{h}_t^{(i_1)}, \dots, \mathbf{h}_t^{(i_k)} \neq \mathbf{0}$  while all other  $\mathbf{h}_t^{(n)}$  values are  $\mathbf{0}$ ,  
 989 the goal of  $\sigma_2$  is to ensure that  $\mathbf{h}_t^{(i_1)} \neq \mathbf{0}$  and the others being  $\mathbf{0}$ .

990 We choose  $\{\mathbf{Q}_m, \mathbf{K}_m, \mathbf{V}_m\}_{m \in \{0, \dots, n\}}$  such that for tokens  $\mathfrak{h}_t$ ,

$$\mathbf{Q}_m \mathfrak{h}_t = \begin{bmatrix} t \\ \sum_{p=0}^{m-1} f_t^{(p)} \\ 1 \\ \epsilon_0 \end{bmatrix}, \quad \mathbf{K}_m \mathfrak{h}_k = \begin{bmatrix} -1 \\ -c_0 \\ k \\ 1 \end{bmatrix}, \quad \mathbf{V}_m \mathfrak{h}_k = [\mathbf{0}; \dots, \mathbf{0}; \mathbf{h}_k^{(m)}; \mathbf{0}; \dots, \mathbf{0}]$$

991 where  $c_0 > 0$  is sufficiently large and  $\epsilon_0 > 0$  is sufficiently small such that  $\epsilon_0 - c_0 f_j < 0$  for any  
 992  $f_j > 0$ . In this way, with  $k < t$  we have

$$\sum_{m=0}^n \mathbb{1}_{>0} (\langle \mathbf{Q}_m \mathfrak{h}_t, \mathbf{K}_m \mathfrak{h}_k \rangle) \mathbf{V}_m \mathfrak{h}_k = \mathbf{0},$$

993 and with  $k = t$  we have

$$\begin{aligned} \sum_{m=0}^n r (\langle \mathbf{Q}_m \mathfrak{h}_t, \mathbf{K}_m \mathfrak{h}_t \rangle) \mathbf{V}_m \mathfrak{h}_t &= \sum_{m=0}^n \mathbb{1}_{>0} \left[ \epsilon_0 - c_0 \sum_{p=0}^{m-1} f_t^p \right] \begin{bmatrix} \mathbf{0} \\ \vdots \\ \mathbf{0} \\ \mathbf{h}_t^{(m)} \\ \mathbf{0} \\ \vdots \\ \mathbf{0} \end{bmatrix} \\ &= \begin{cases} \begin{bmatrix} \mathbf{0} \\ \vdots \\ \mathbf{0} \\ \mathbf{h}_t^{(m)} \\ \mathbf{0} \\ \vdots \\ \mathbf{0} \end{bmatrix}, & \text{if } \sum_{p=0}^{m-1} f_t^p = 0 \\ \mathbf{0}, & \text{otherwise} \end{cases} \end{aligned}$$

994 Since  $\sum_{p=0}^{m-1} f_t^p = 0$  is equivalent to  $\mathbf{h}_t^{(0)} = \dots = \mathbf{h}_t^{(p-1)} = \mathbf{0}$ , we have for each  $t \in [T]$  that

$$\sum_{m=0}^n \sum_{k=1}^t \mathbb{1}_{>0} [\langle \mathbf{Q}_m \mathbf{h}_t, \mathbf{K}_m \mathbf{h}_k \rangle] \mathbf{V}_m \mathbf{h}_k = \begin{bmatrix} \mathbf{0} \\ \vdots \\ \mathbf{0} \\ \mathbf{h}_t^{(q)} \\ \mathbf{0} \\ \vdots \\ \mathbf{0} \end{bmatrix}$$

995 where  $\mathbf{h}_t^{(0)} = \dots = \mathbf{h}_t^{(q-1)} = \mathbf{0}$  and  $\mathbf{h}_t^{(m)} \neq \mathbf{0}$ . Finally, referring the approximation of  $\mathbb{1}_{>0}[\cdot]$   
 996 (D.2.1), we can approximate  $\mathbb{1}_{>0}[\cdot]$  using 2 ReLU functions. Therefore,  $\sigma_2$  can be approximated by  
 997 a  $2(n+1)$ -head masked attention layer.  $\square$

### 998 D.3 Equivalence of WS and RM with previous works

#### 999 D.3.1 WS

1000 Sliding windows used in previous works (e.g., (Cheung et al., 2022; Fiandri et al., 2024)) can be  
 1001 regarded as special cases of WS. Specifically, they are equivalent to WS when WS contains only one  
 1002 instance, all windows are of equal size, and they are connected without overlap. Figure 9 shows  
 1003 the equivalence between the stochastic instance scheduler in MASTER and the sliding window  
 1004 schedulers from previous works.

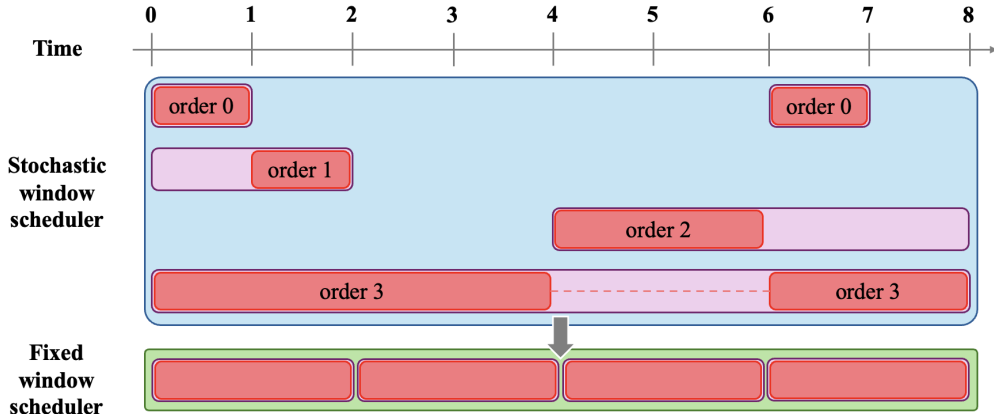

Figure 9: Equivalence between the stochastic instance scheduler in MASTER and the sliding window schedulers from previous works. Purplish blocks represent scheduled blocks, while reddish blocks represent active ones. Reddish blocks connected by a dashed line are concatenated. Here,  $T = 8$  and the sliding window size is 2.

#### 1005 D.3.2 RM

1006 The restart strategies in previous works can be classified into two types: stochastic and deterministic  
 1007 (Gomes et al., 1998; Streeter and Golovin, 2008). Stochastic restarts typically involve randomness  
 1008 or a test, whereas deterministic restarts are generally performed after a set number of rounds. There-  
 1009 fore, deterministic restarts can be considered a special case of sliding window strategies. Regarding  
 1010 stochastic restarts, since we have demonstrated that transformers can generate random numbers and  
 1011 that MLPs can perform stationary tests, we can conclude, based on the universal approximation  
 1012 theorem (Definition 8), that stochastic restarts can also be approximated by transformers.

1013 **Definition 8** (Universal Approximation Theorem for MLPs). *Let  $f$  be a continuous function from a*  
 1014 *compact subset  $K \subseteq \mathbb{R}^n$  to  $\mathbb{R}^m$ . Suppose  $\sigma : \mathbb{R} \rightarrow \mathbb{R}$  is a non-polynomial, continuous activation*  
 1015 *function applied component-wise.*

1016 *Then, for any  $\epsilon > 0$ , there exists a single hidden-layer MLP that approximates  $f$  to within  $\epsilon$ . Specifically, there exist weights  $A \in \mathbb{R}^{k \times n}$ ,  $b \in \mathbb{R}^k$ ,  $C \in \mathbb{R}^{m \times k}$ , and a sufficiently large number of hidden*  
 1017 *units  $k$  such that the MLP*  
 1018 *satisfies*

$$g(x) = C \cdot \sigma(A \cdot x + b)$$

1019 *satisfies*

$$\sup_{x \in K} \|f(x) - g(x)\| < \epsilon.$$

## 1020 **NeurIPS Paper Checklist**

### 1021 **1. Claims**

1022 Question: Do the main claims made in the abstract and introduction accurately reflect the  
 1023 paper’s contributions and scope?

1024 Answer: [\[Yes\]](#)

1025 Justification: We clearly stated the main claim in the abstract and introduction.

1026 Guidelines:

- 1027 • The answer NA means that the abstract and introduction do not include the claims  
 1028 made in the paper.
- 1029 • The abstract and/or introduction should clearly state the claims made, including the  
 1030 contributions made in the paper and important assumptions and limitations. A No or  
 1031 NA answer to this question will not be perceived well by the reviewers.
- 1032 • The claims made should match theoretical and experimental results, and reflect how  
 1033 much the results can be expected to generalize to other settings.
- 1034 • It is fine to include aspirational goals as motivation as long as it is clear that these  
 1035 goals are not attained by the paper.

### 1036 **2. Limitations**

1037 Question: Does the paper discuss the limitations of the work performed by the authors?

1038 Answer: [\[Yes\]](#)

1039 Justification: We stated the limitation in the last section for discussion.

1040 Guidelines:

- 1041 • The answer NA means that the paper has no limitation while the answer No means  
 1042 that the paper has limitations, but those are not discussed in the paper.
- 1043 • The authors are encouraged to create a separate "Limitations" section in their paper.
- 1044 • The paper should point out any strong assumptions and how robust the results are to  
 1045 violations of these assumptions (e.g., independence assumptions, noiseless settings,  
 1046 model well-specification, asymptotic approximations only holding locally). The au-  
 1047 thors should reflect on how these assumptions might be violated in practice and what  
 1048 the implications would be.
- 1049 • The authors should reflect on the scope of the claims made, e.g., if the approach was  
 1050 only tested on a few datasets or with a few runs. In general, empirical results often  
 1051 depend on implicit assumptions, which should be articulated.
- 1052 • The authors should reflect on the factors that influence the performance of the ap-  
 1053 proach. For example, a facial recognition algorithm may perform poorly when image  
 1054 resolution is low or images are taken in low lighting. Or a speech-to-text system might  
 1055 not be used reliably to provide closed captions for online lectures because it fails to  
 1056 handle technical jargon.
- 1057 • The authors should discuss the computational efficiency of the proposed algorithms  
 1058 and how they scale with dataset size.
- 1059 • If applicable, the authors should discuss possible limitations of their approach to ad-  
 1060 dress problems of privacy and fairness.
- 1061 • While the authors might fear that complete honesty about limitations might be used by  
 1062 reviewers as grounds for rejection, a worse outcome might be that reviewers discover  
 1063 limitations that aren’t acknowledged in the paper. The authors should use their best

1064 judgment and recognize that individual actions in favor of transparency play an impor-  
1065 tant role in developing norms that preserve the integrity of the community. Reviewers  
1066 will be specifically instructed to not penalize honesty concerning limitations.

### 1067 3. Theory assumptions and proofs

1068 Question: For each theoretical result, does the paper provide the full set of assumptions and  
1069 a complete (and correct) proof?

1070 Answer: [Yes]

1071 Justification: We have described the full assumption, statements, and proof in the main  
1072 body and the appendix.

1073 Guidelines:

- 1074 • The answer NA means that the paper does not include theoretical results.
- 1075 • All the theorems, formulas, and proofs in the paper should be numbered and cross-  
1076 referenced.
- 1077 • All assumptions should be clearly stated or referenced in the statement of any theo-  
1078 rems.
- 1079 • The proofs can either appear in the main paper or the supplemental material, but if  
1080 they appear in the supplemental material, the authors are encouraged to provide a  
1081 short proof sketch to provide intuition.
- 1082 • Inversely, any informal proof provided in the core of the paper should be comple-  
1083 mented by formal proofs provided in appendix or supplemental material.
- 1084 • Theorems and Lemmas that the proof relies upon should be properly referenced.

### 1085 4. Experimental result reproducibility

1086 Question: Does the paper fully disclose all the information needed to reproduce the main  
1087 experimental results of the paper to the extent that it affects the main claims and/or conclu-  
1088 sions of the paper (regardless of whether the code and data are provided or not)?

1089 Answer: [Yes]

1090 Justification: We have described the detailed experimental details in the corresponding  
1091 section in the appendix.

1092 Guidelines:

- 1093 • The answer NA means that the paper does not include experiments.
- 1094 • If the paper includes experiments, a No answer to this question will not be perceived  
1095 well by the reviewers: Making the paper reproducible is important, regardless of  
1096 whether the code and data are provided or not.
- 1097 • If the contribution is a dataset and/or model, the authors should describe the steps  
1098 taken to make their results reproducible or verifiable.
- 1099 • Depending on the contribution, reproducibility can be accomplished in various ways.  
1100 For example, if the contribution is a novel architecture, describing the architecture  
1101 fully might suffice, or if the contribution is a specific model and empirical evaluation,  
1102 it may be necessary to either make it possible for others to replicate the model with  
1103 the same dataset, or provide access to the model. In general, releasing code and data  
1104 is often one good way to accomplish this, but reproducibility can also be provided via  
1105 detailed instructions for how to replicate the results, access to a hosted model (e.g., in  
1106 the case of a large language model), releasing of a model checkpoint, or other means  
1107 that are appropriate to the research performed.
- 1108 • While NeurIPS does not require releasing code, the conference does require all sub-  
1109 missions to provide some reasonable avenue for reproducibility, which may depend  
1110 on the nature of the contribution. For example
  - 1111 (a) If the contribution is primarily a new algorithm, the paper should make it clear  
1112 how to reproduce that algorithm.
  - 1113 (b) If the contribution is primarily a new model architecture, the paper should describe  
1114 the architecture clearly and fully.

- 1115 (c) If the contribution is a new model (e.g., a large language model), then there should  
1116 either be a way to access this model for reproducing the results or a way to re-  
1117 produce the model (e.g., with an open-source dataset or instructions for how to  
1118 construct the dataset).
- 1119 (d) We recognize that reproducibility may be tricky in some cases, in which case au-  
1120 thors are welcome to describe the particular way they provide for reproducibility.  
1121 In the case of closed-source models, it may be that access to the model is limited in  
1122 some way (e.g., to registered users), but it should be possible for other researchers  
1123 to have some path to reproducing or verifying the results.

## 1124 5. Open access to data and code

1125 Question: Does the paper provide open access to the data and code, with sufficient instruc-  
1126 tions to faithfully reproduce the main experimental results, as described in supplemental  
1127 material?

1128 Answer: [Yes]

1129 Justification: We clearly stated the source of data. Also, we will open the source code.

1130 Guidelines:

- 1131 • The answer NA means that paper does not include experiments requiring code.
- 1132 • Please see the NeurIPS code and data submission guidelines ([https://nips.cc/  
1133 public/guides/CodeSubmissionPolicy](https://nips.cc/public/guides/CodeSubmissionPolicy)) for more details.
- 1134 • While we encourage the release of code and data, we understand that this might not  
1135 be possible, so “No” is an acceptable answer. Papers cannot be rejected simply for not  
1136 including code, unless this is central to the contribution (e.g., for a new open-source  
1137 benchmark).
- 1138 • The instructions should contain the exact command and environment needed to run to  
1139 reproduce the results. See the NeurIPS code and data submission guidelines ([https:  
1140 //nips.cc/public/guides/CodeSubmissionPolicy](https://nips.cc/public/guides/CodeSubmissionPolicy)) for more details.
- 1141 • The authors should provide instructions on data access and preparation, including how  
1142 to access the raw data, preprocessed data, intermediate data, and generated data, etc.
- 1143 • The authors should provide scripts to reproduce all experimental results for the new  
1144 proposed method and baselines. If only a subset of experiments are reproducible, they  
1145 should state which ones are omitted from the script and why.
- 1146 • At submission time, to preserve anonymity, the authors should release anonymized  
1147 versions (if applicable).
- 1148 • Providing as much information as possible in supplemental material (appended to the  
1149 paper) is recommended, but including URLs to data and code is permitted.

## 1150 6. Experimental setting/details

1151 Question: Does the paper specify all the training and test details (e.g., data splits, hyper-  
1152 parameters, how they were chosen, type of optimizer, etc.) necessary to understand the  
1153 results?

1154 Answer: [Yes]

1155 Justification: We have clearly described the experimental details in the appendix.

1156 Guidelines:

- 1157 • The answer NA means that the paper does not include experiments.
- 1158 • The experimental setting should be presented in the core of the paper to a level of  
1159 detail that is necessary to appreciate the results and make sense of them.
- 1160 • The full details can be provided either with the code, in appendix, or as supplemental  
1161 material.

## 1162 7. Experiment statistical significance

1163 Question: Does the paper report error bars suitably and correctly defined or other appropri-  
1164 ate information about the statistical significance of the experiments?

1165 Answer: [Yes]



Justification: We have repeated the experimental multiple times and report the standard deviation comes from the replication.

Guidelines:

- The answer NA means that the paper does not include experiments.
- The authors should answer "Yes" if the results are accompanied by error bars, confidence intervals, or statistical significance tests, at least for the experiments that support the main claims of the paper.
- The factors of variability that the error bars are capturing should be clearly stated (for example, train/test split, initialization, random drawing of some parameter, or overall run with given experimental conditions).
- The method for calculating the error bars should be explained (closed form formula, call to a library function, bootstrap, etc.)
- The assumptions made should be given (e.g., Normally distributed errors).
- It should be clear whether the error bar is the standard deviation or the standard error of the mean.
- It is OK to report 1-sigma error bars, but one should state it. The authors should preferably report a 2-sigma error bar than state that they have a 96% CI, if the hypothesis of Normality of errors is not verified.
- For asymmetric distributions, the authors should be careful not to show in tables or figures symmetric error bars that would yield results that are out of range (e.g. negative error rates).
- If error bars are reported in tables or plots, The authors should explain in the text how they were calculated and reference the corresponding figures or tables in the text.

## 8. Experiments compute resources

Question: For each experiment, does the paper provide sufficient information on the computer resources (type of compute workers, memory, time of execution) needed to reproduce the experiments?

Answer: [No]

Justification: Our experiments are small-scale and implementable by a small laptop. Also, we do not pursue the computational cost in this study, so the computational resource is out of our focus.

Guidelines:

- The answer NA means that the paper does not include experiments.
- The paper should indicate the type of compute workers CPU or GPU, internal cluster, or cloud provider, including relevant memory and storage.
- The paper should provide the amount of compute required for each of the individual experimental runs as well as estimate the total compute.
- The paper should disclose whether the full research project required more compute than the experiments reported in the paper (e.g., preliminary or failed experiments that didn't make it into the paper).

## 9. Code of ethics

Question: Does the research conducted in the paper conform, in every respect, with the NeurIPS Code of Ethics <https://neurips.cc/public/EthicsGuidelines>?

Answer: [Yes]

Justification: We have checked the code.

Guidelines:

- The answer NA means that the authors have not reviewed the NeurIPS Code of Ethics.
- If the authors answer No, they should explain the special circumstances that require a deviation from the Code of Ethics.
- The authors should make sure to preserve anonymity (e.g., if there is a special consideration due to laws or regulations in their jurisdiction).

## 10. Broader impacts

1218 Question: Does the paper discuss both potential positive societal impacts and negative  
1219 societal impacts of the work performed?

1220 Answer: [No]

1221 Justification: A main focus of this study is fundamental, so there is almost no effect on  
1222 social impacts.

1223 Guidelines:

- 1224 • The answer NA means that there is no societal impact of the work performed.
- 1225 • If the authors answer NA or No, they should explain why their work has no societal  
1226 impact or why the paper does not address societal impact.
- 1227 • Examples of negative societal impacts include potential malicious or unintended uses  
1228 (e.g., disinformation, generating fake profiles, surveillance), fairness considerations  
1229 (e.g., deployment of technologies that could make decisions that unfairly impact spe-  
1230 cific groups), privacy considerations, and security considerations.
- 1231 • The conference expects that many papers will be foundational research and not tied  
1232 to particular applications, let alone deployments. However, if there is a direct path to  
1233 any negative applications, the authors should point it out. For example, it is legitimate  
1234 to point out that an improvement in the quality of generative models could be used to  
1235 generate deepfakes for disinformation. On the other hand, it is not needed to point out  
1236 that a generic algorithm for optimizing neural networks could enable people to train  
1237 models that generate Deepfakes faster.
- 1238 • The authors should consider possible harms that could arise when the technology is  
1239 being used as intended and functioning correctly, harms that could arise when the  
1240 technology is being used as intended but gives incorrect results, and harms following  
1241 from (intentional or unintentional) misuse of the technology.
- 1242 • If there are negative societal impacts, the authors could also discuss possible mitiga-  
1243 tion strategies (e.g., gated release of models, providing defenses in addition to attacks,  
1244 mechanisms for monitoring misuse, mechanisms to monitor how a system learns from  
1245 feedback over time, improving the efficiency and accessibility of ML).

## 1246 11. Safeguards

1247 Question: Does the paper describe safeguards that have been put in place for responsible  
1248 release of data or models that have a high risk for misuse (e.g., pretrained language models,  
1249 image generators, or scraped datasets)?

1250 Answer: [No]

1251 Justification: Since this paper is theoretical, the outcome does not have a high risk for  
1252 misuse.

1253 Guidelines:

- 1254 • The answer NA means that the paper poses no such risks.
- 1255 • Released models that have a high risk for misuse or dual-use should be released with  
1256 necessary safeguards to allow for controlled use of the model, for example by re-  
1257 quiring that users adhere to usage guidelines or restrictions to access the model or  
1258 implementing safety filters.
- 1259 • Datasets that have been scraped from the Internet could pose safety risks. The authors  
1260 should describe how they avoided releasing unsafe images.
- 1261 • We recognize that providing effective safeguards is challenging, and many papers do  
1262 not require this, but we encourage authors to take this into account and make a best  
1263 faith effort.

## 1264 12. Licenses for existing assets

1265 Question: Are the creators or original owners of assets (e.g., code, data, models), used in  
1266 the paper, properly credited and are the license and terms of use explicitly mentioned and  
1267 properly respected?

1268 Answer: [Yes]

1269 Justification: We have cited the source of the data which we use.

1270 Guidelines:

- The answer NA means that the paper does not use existing assets.
- The authors should cite the original paper that produced the code package or dataset.
- The authors should state which version of the asset is used and, if possible, include a URL.
- The name of the license (e.g., CC-BY 4.0) should be included for each asset.
- For scraped data from a particular source (e.g., website), the copyright and terms of service of that source should be provided.
- If assets are released, the license, copyright information, and terms of use in the package should be provided. For popular datasets, [paperswithcode.com/datasets](https://paperswithcode.com/datasets) has curated licenses for some datasets. Their licensing guide can help determine the license of a dataset.
- For existing datasets that are re-packaged, both the original license and the license of the derived asset (if it has changed) should be provided.
- If this information is not available online, the authors are encouraged to reach out to the asset's creators.

### 13. New assets

Question: Are new assets introduced in the paper well documented and is the documentation provided alongside the assets?

Answer: [No]

Justification: We have not created a new asset throughout this study.

Guidelines:

- The answer NA means that the paper does not release new assets.
- Researchers should communicate the details of the dataset/code/model as part of their submissions via structured templates. This includes details about training, license, limitations, etc.
- The paper should discuss whether and how consent was obtained from people whose asset is used.
- At submission time, remember to anonymize your assets (if applicable). You can either create an anonymized URL or include an anonymized zip file.

### 14. Crowdsourcing and research with human subjects

Question: For crowdsourcing experiments and research with human subjects, does the paper include the full text of instructions given to participants and screenshots, if applicable, as well as details about compensation (if any)?

Answer: [No]

Justification: We have not performed the crowdsourcing experiments and others.

Guidelines:

- The answer NA means that the paper does not involve crowdsourcing nor research with human subjects.
- Including this information in the supplemental material is fine, but if the main contribution of the paper involves human subjects, then as much detail as possible should be included in the main paper.
- According to the NeurIPS Code of Ethics, workers involved in data collection, curation, or other labor should be paid at least the minimum wage in the country of the data collector.

### 15. Institutional review board (IRB) approvals or equivalent for research with human subjects

Question: Does the paper describe potential risks incurred by study participants, whether such risks were disclosed to the subjects, and whether Institutional Review Board (IRB) approvals (or an equivalent approval/review based on the requirements of your country or institution) were obtained?

Answer: [No]

Justification: Since this study is fundamental, there is no potential risk on this point.

1323 Guidelines:

1324 • The answer NA means that the paper does not involve crowdsourcing nor research

1325 with human subjects.

1326 • Depending on the country in which research is conducted, IRB approval (or equiva-

1327 lent) may be required for any human subjects research. If you obtained IRB approval,

1328 you should clearly state this in the paper.

1329 • We recognize that the procedures for this may vary significantly between institutions

1330 and locations, and we expect authors to adhere to the NeurIPS Code of Ethics and the

1331 guidelines for their institution.

1332 • For initial submissions, do not include any information that would break anonymity

1333 (if applicable), such as the institution conducting the review.

1334 **16. Declaration of LLM usage**

1335 Question: Does the paper describe the usage of LLMs if it is an important, original, or

1336 non-standard component of the core methods in this research? Note that if the LLM is used

1337 only for writing, editing, or formatting purposes and does not impact the core methodology,

1338 scientific rigorousness, or originality of the research, declaration is not required.

1339 Answer: [No]

1340 Justification: We have used LLM only for the formatting purposes.

1341 Guidelines:

1342 • The answer NA means that the core method development in this research does not

1343 involve LLMs as any important, original, or non-standard components.

1344 • Please refer to our LLM policy (<https://neurips.cc/Conferences/2025/LLM>)

1345 for what should or should not be described.
